# Supplementary material
Source: HighWire-hosted journal article supplement (https://bmjopen.bmj.com/content/10/1/e032734)
Supplement: inline-supplementary-material-3 [file inline-supplementary-material-3.pdf]

## **Team-based Contract Service List (ROADMAP)**

### **1. Basic public health services**

This includes routine management of patients with chronic diseases (hypertension, type 2 diabetes)

### **2. Personally tailored diabetes management services (as follow):**

#### **2.1 Graded diabetes management according to different health need**

Intensive management services for contracted patients with suspected early complications, unstable complications or poorly controlled blood glucose. Routine management services will be provided to contracted patients present well-controlled blood glucose, without complications or stable complications. The management level shall be adjusted once every six months, according to the disease progression.

#### **2.2 Information management via Graded ROADMAP APP**

The three-tiered doctor teams are required to upload each follow-up records and out-patient medical records of the contracted patients to the management via the Graded ROADMAP APP. The APP will alarms doctor with abnormal health record automatically, and allows the record sharing within the corresponding team members to provide refined and continuous diabetes management for contracted patients.

#### **2.3 Referral Green Channel**

Members of the contracted doctor team will initial referral applications for the contracted patients with referral indications through the APP, and the superior doctors will decide whether accept or decline the referral based on the previous records.

#### **2.4 Monthly planned blood glucose monitoring**

Blood glucose monitoring services will be provided monthly according to patients' conditions. The blood glucose reading will be immediately synchronized to the APP, which can be used for treatment reference.

#### **2.5 Patient education platform service**

Patients could join the patient education platform by installing a mobile APP, *Your doctor*. Within this APP, patients can interact with the contracted team doctors as online consultation and receive health educational messages.
